# Supplementary material for: Evaluation of the Oxidative Stress Response of Aging Yeast Cells in Response to Internalization of Fluorescent Nanodiamond Biosensors
Source: MDPI journal article supplement (doi:10.3390/nano10020372), 2020-02-20
Supplement: s1 [file s1]

## Supplementary

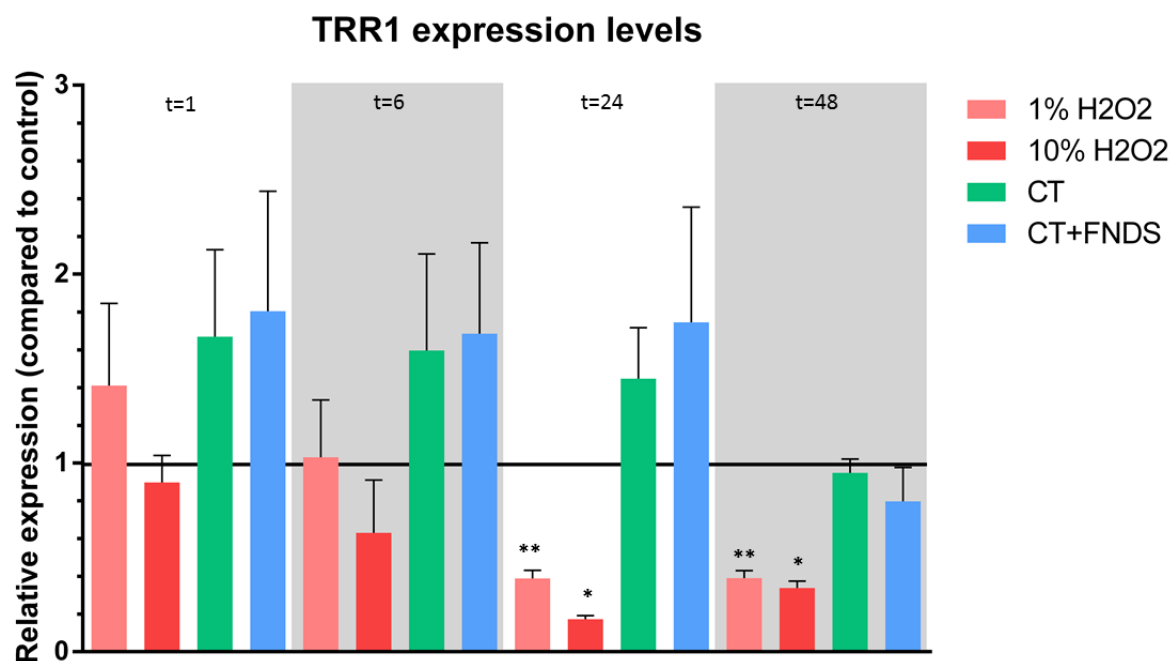

**Figure S1.** Relative expression of TRR1, key regulatory enzyme of the thioredoxin system. The colors represent different conditions, measured at 1/6/24/48 hours respectively. Error bars show the standard error of the mean. Significance tested against the control (\* $p \leq 0.05$ , \*\* $p \leq 0.01$ ).
